# Supplementary material for: Arthrospira platensis Mutagenesis for Protein and C-Phycocyanin Improvement and Proteomics Approaches
Source: MDPI journal article supplement (doi:10.3390/life12060911), 2022-06-17
Supplement: s1 [file s1]

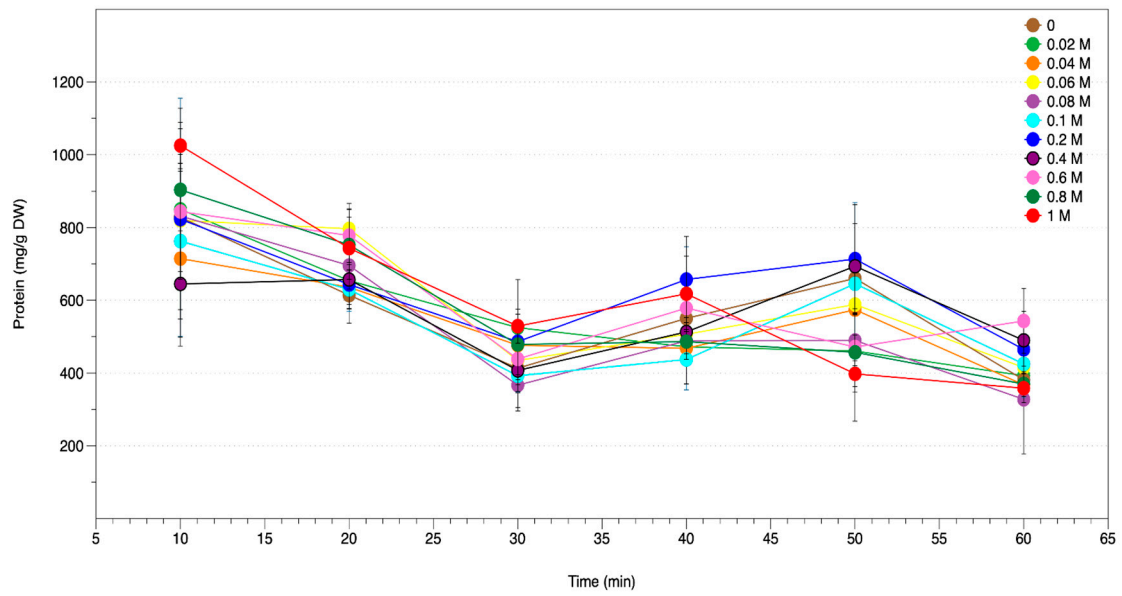

**Figure S1.** Protein content from *A. platensis* mutagenesis treated by DES at various conditions.

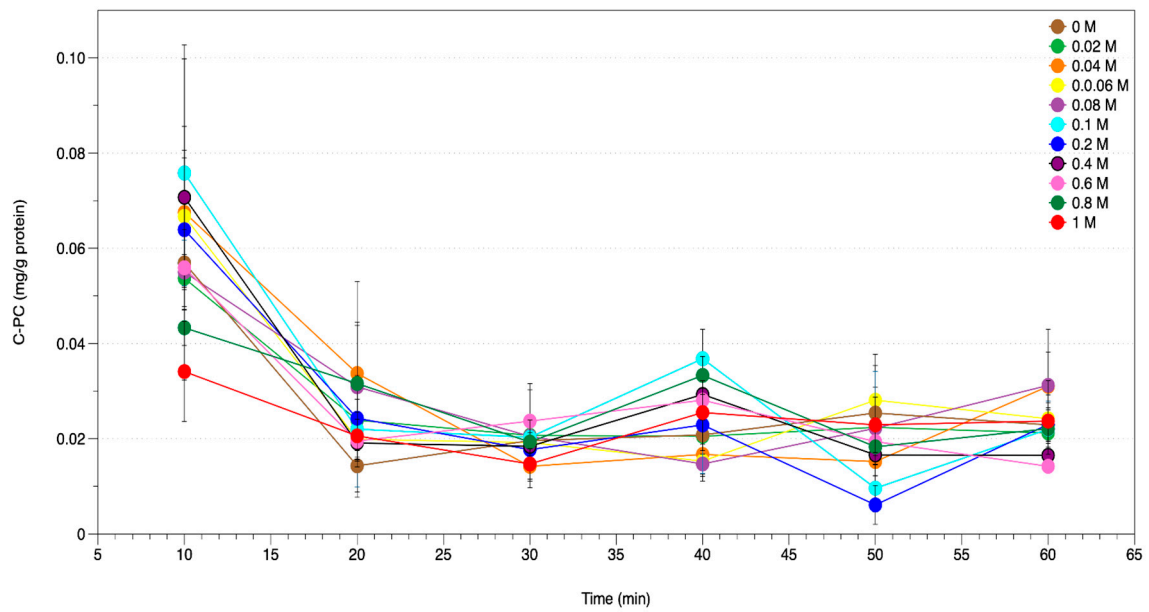

**Figure S2.** C-phycocyanin content from *A. platensis* mutagenesis treated by DES at various conditions.
